# Supplementary material
Source: publisher figshare collection journal article supplement (https://acs.figshare.com/ndownloader/files/9653449)
Supplement: Supplementary file 1 [file 9653449]

## Supporting Information

### **Thermodynamic aspects of solubility and solvation of bioactive bicyclic derivatives in organic solvents**

Svetlana V. Blokhina<sup>1</sup>, Angelica V. Sharapova<sup>1\*</sup>, Marina V. Ol'khovich<sup>1</sup>, Tatyana V. Volkova<sup>1</sup>, Alexey N. Proshin<sup>2</sup>, German L. Perlovich<sup>1</sup>

<sup>1</sup>*Institute of Solution Chemistry, Russian Academy of Sciences, 1 Akademicheskaya Street, 153045, Ivanovo, Russia*

<sup>2</sup>*Institute of Physiologically Active Compounds, Russian Academy of Sciences, 142432, Chernogolovka, Russia*

\*Corresponding author. Phone: 7 (4932)351545; fax: 7(4932)336246

E-mail: [avs@isc-ras.ru](mailto:avs@isc-ras.ru)

1

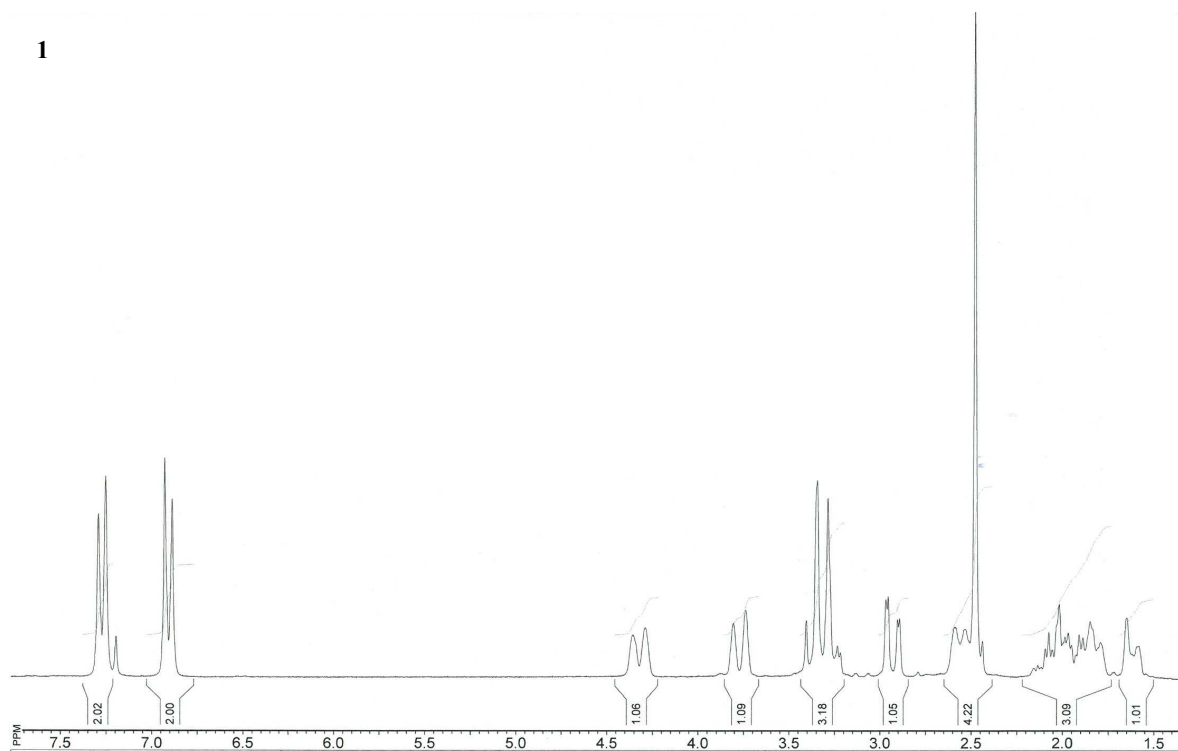

2

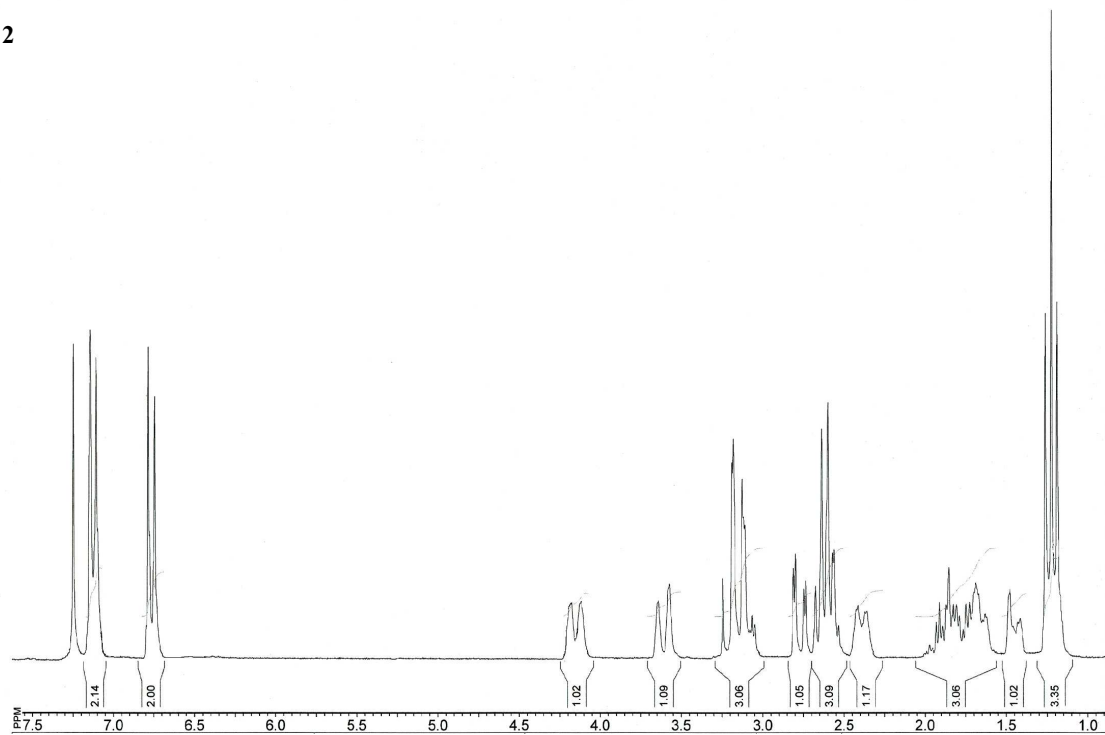

3

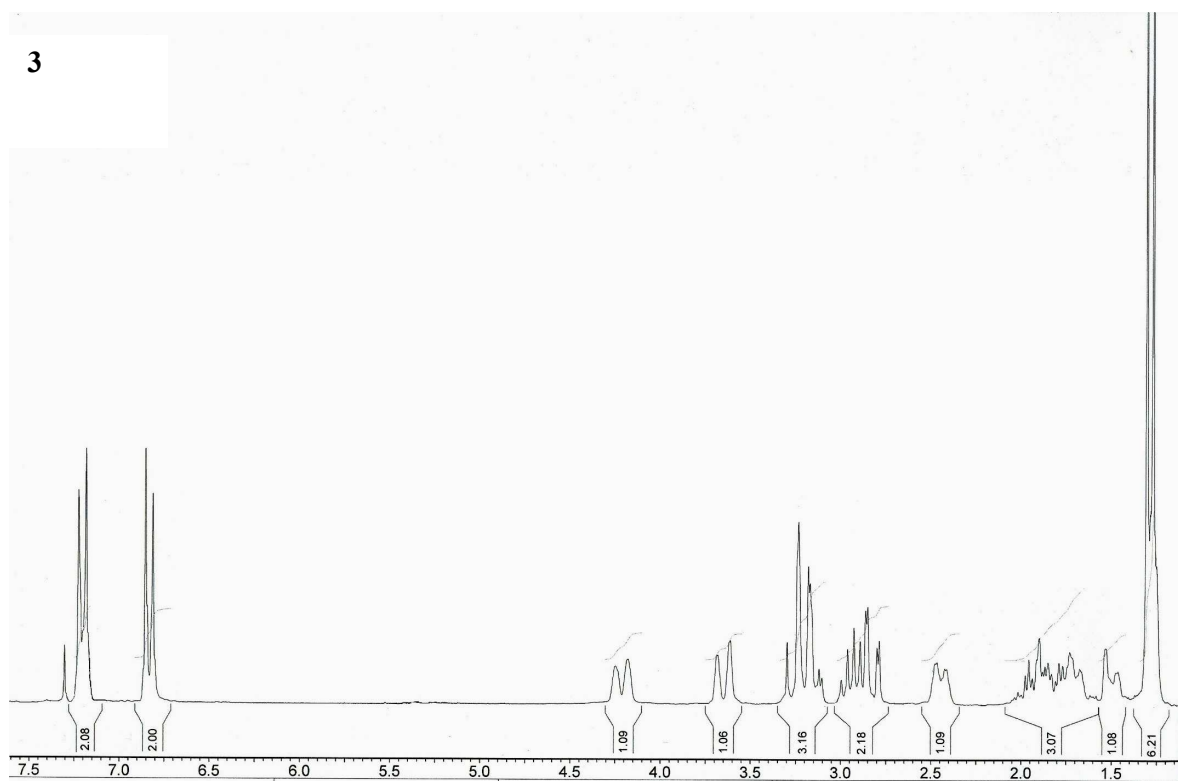

4

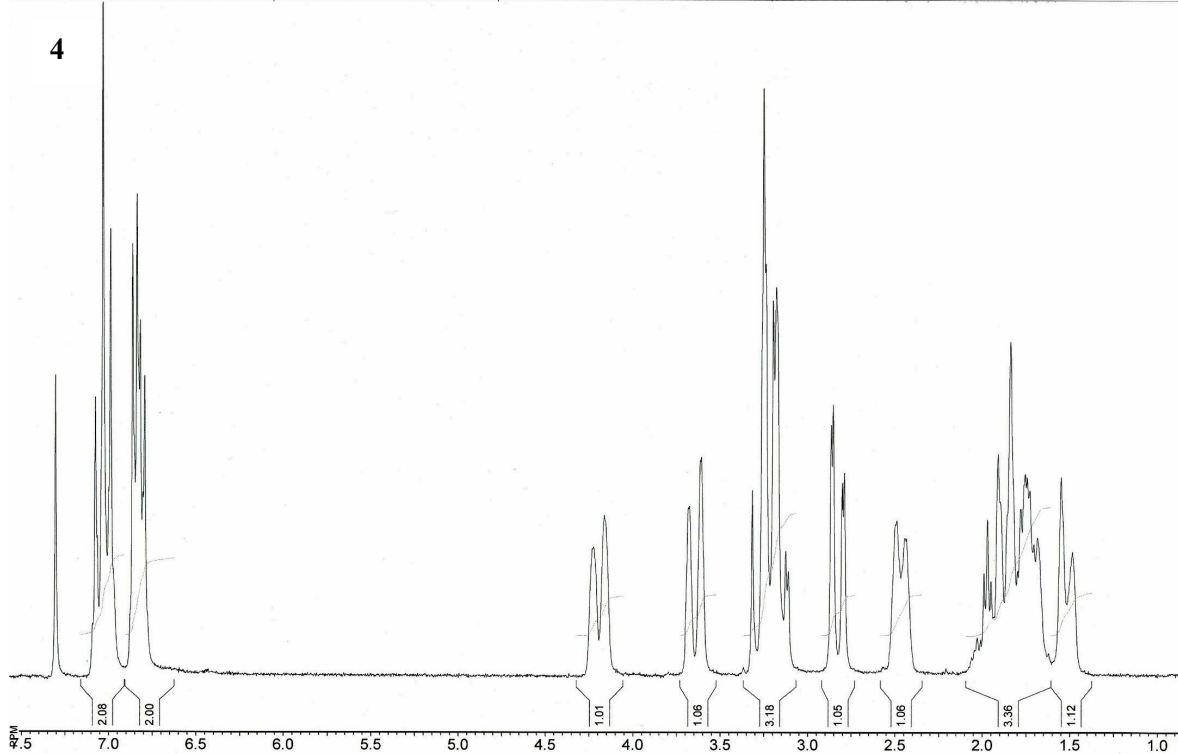

5

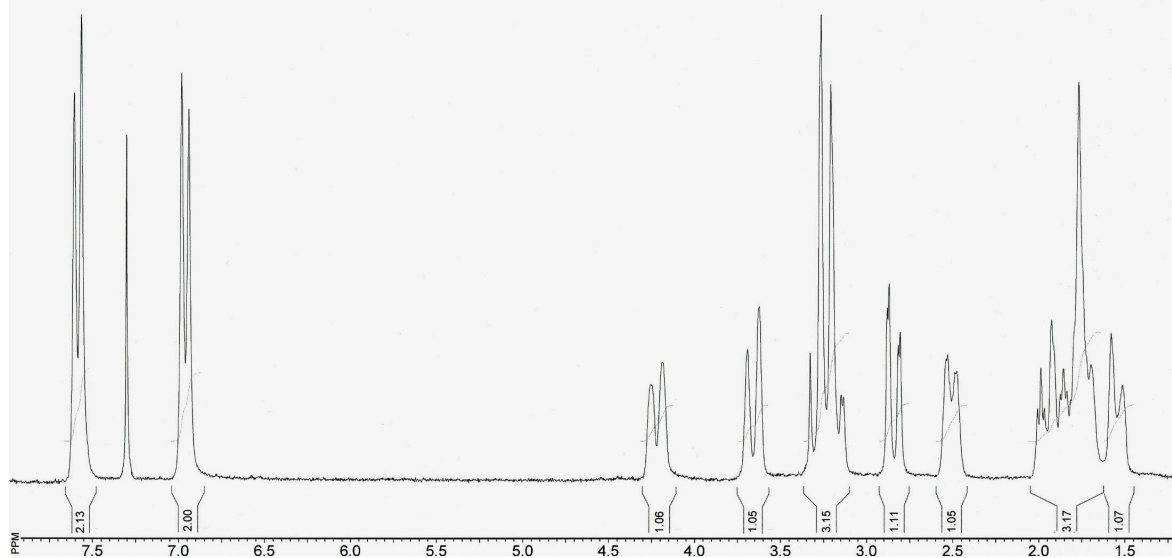

6

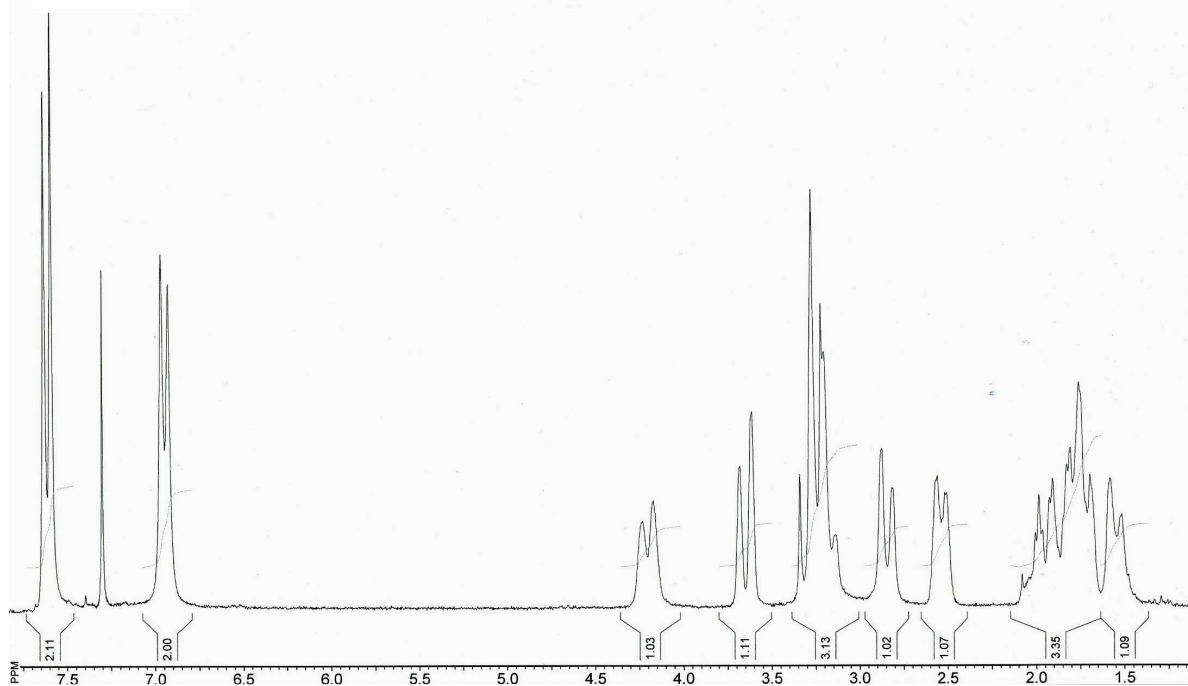

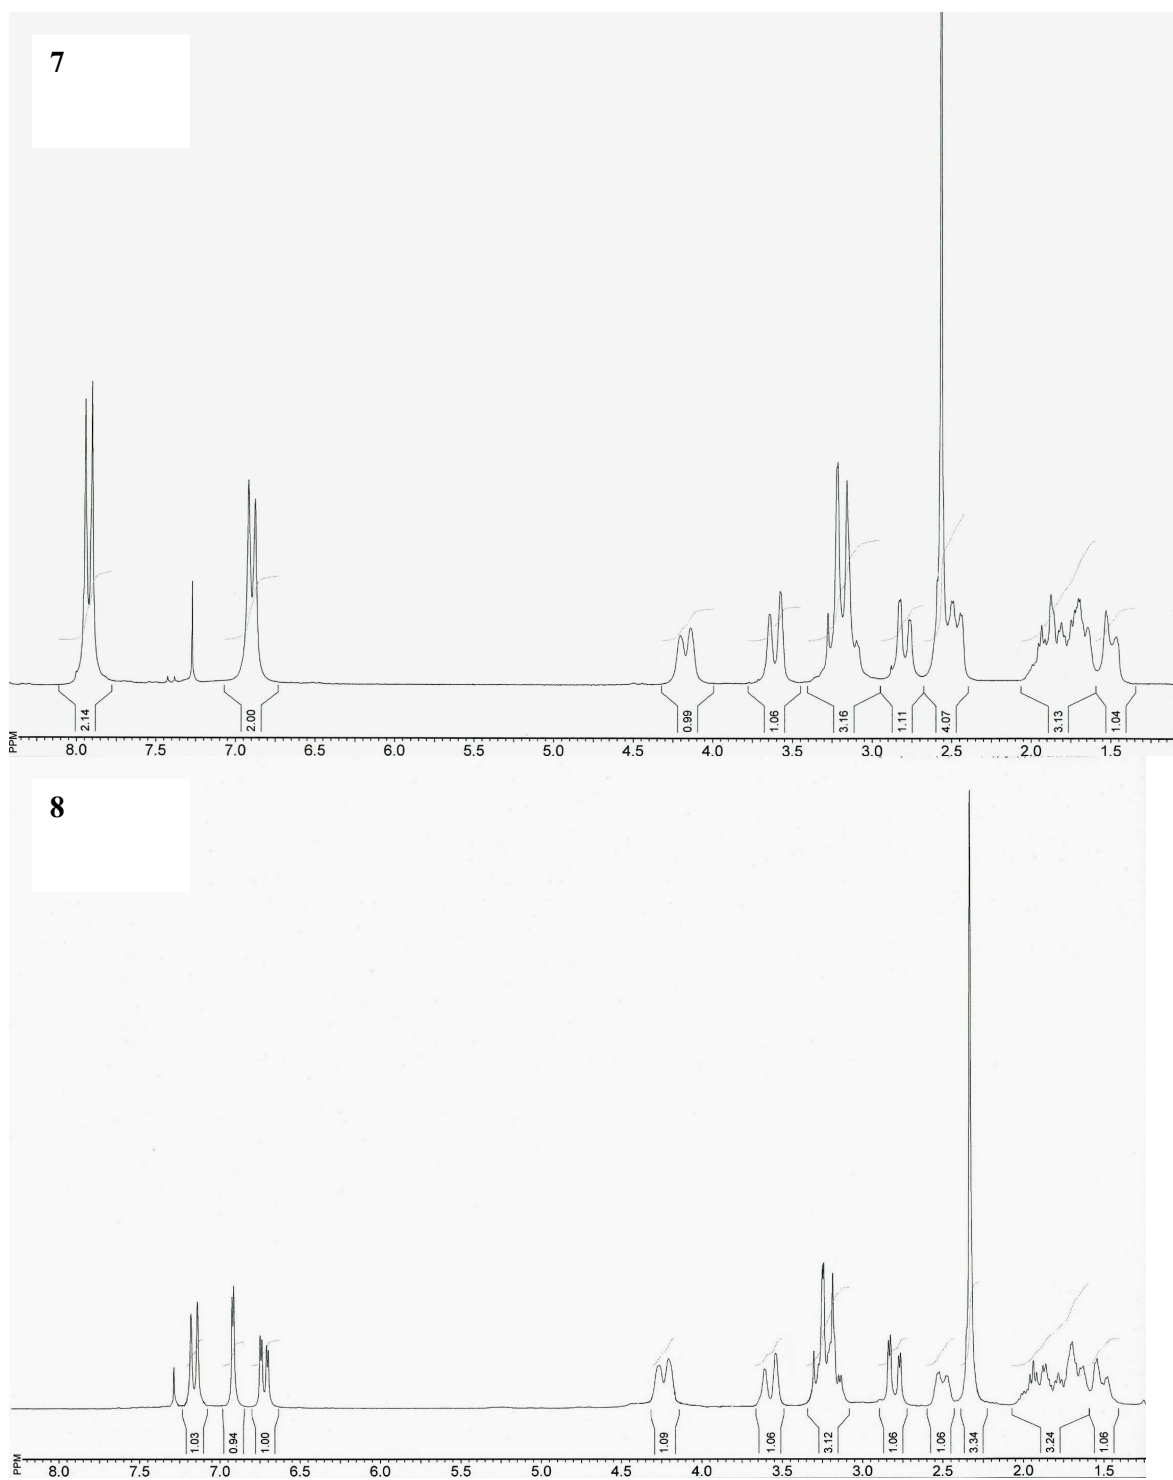

**Figure S1.**  $^1\text{H}$  NMR spectra of compounds studied (1- 8).

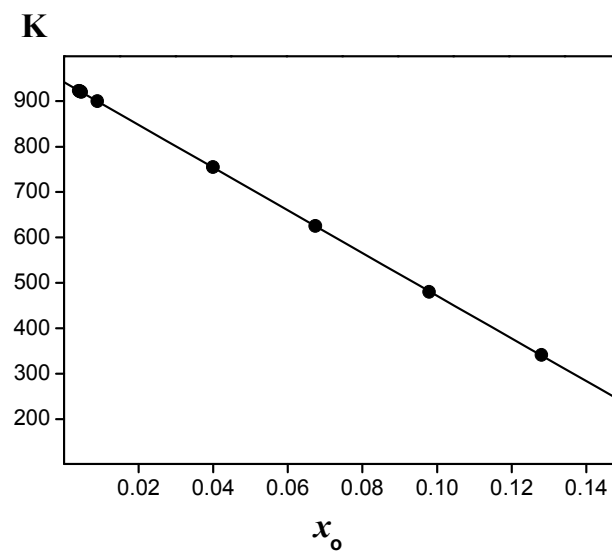

**Figure S2.** Distribution coefficients of compound **1** in system 1-octanol/buffer pH 7.4 ( $K$ ) *versus* concentration in 1-octanol phase.
